# Supplementary material for: Morphological, Chemical, and Genetic Characteristics of Korean Native Thyme Bak-Ri-Hyang (Thymus quinquecostatus Celak.)
Source: PubMed Central journal article supplement (PMC7344789; doi:10.3390/antibiotics9060289), 2020-05-28
Supplement: antibiotics-09-00289-s001.pdf [file antibiotics-09-00289-s001.pdf]

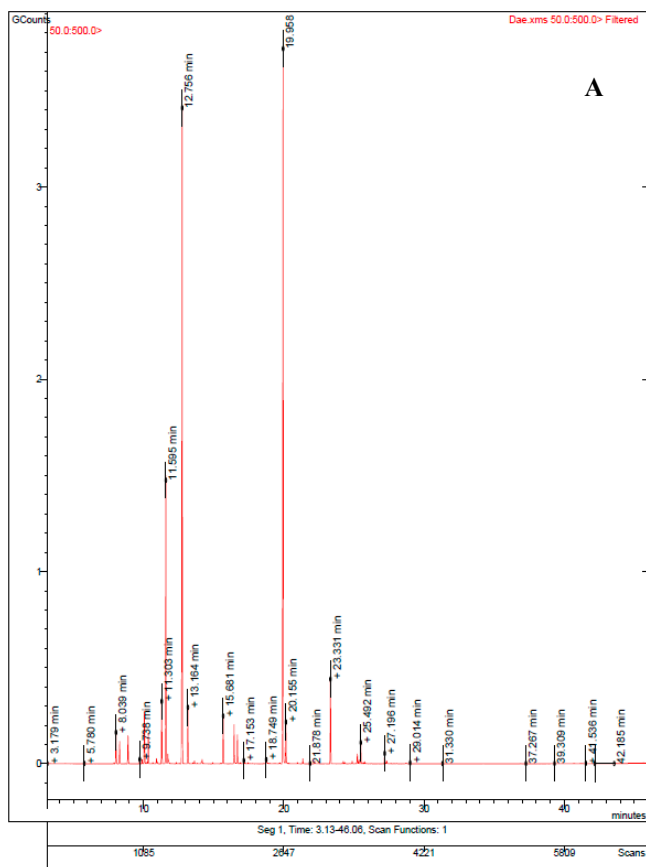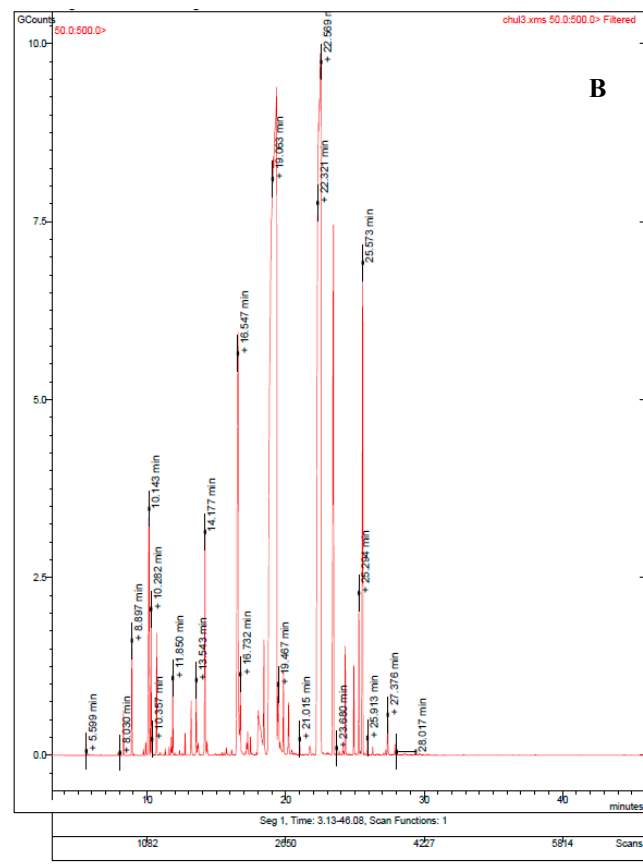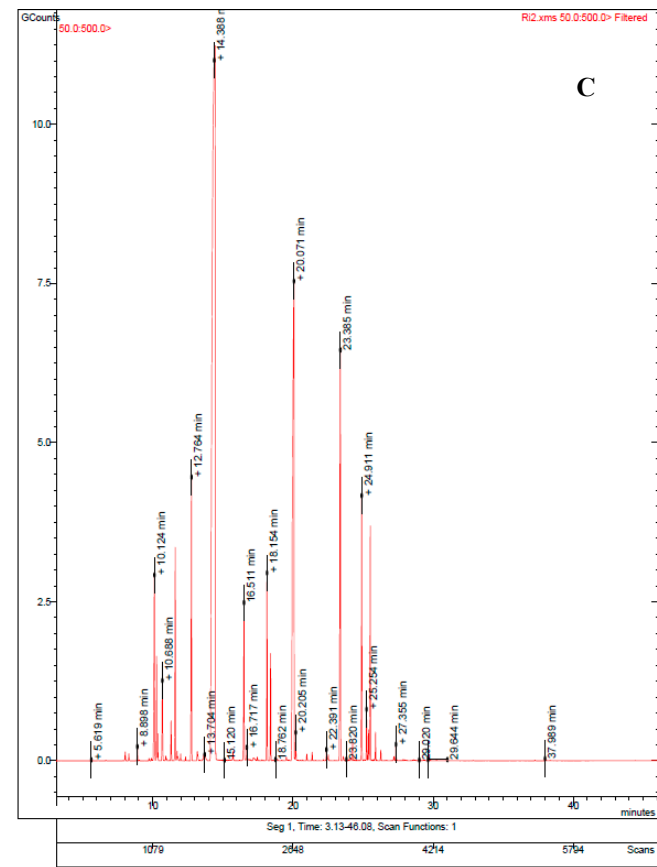

**Supplementary Figure 1.** GC-MS chromatograms of essential oils from three Korean native *Thymus quinquecostatus* cultivars. A, Odae cultivar; B, Wolchul cultivar; C, Jiri cultivar.
